# Supplementary material
Source: MDPI journal article supplement (https://www.mdpi.com/2073-4395/11/10/2023)
Supplement: s1 [file s1]

Archive with 2 entries (2 files):
- SM-Figure.pdf
- SM-Table.pdf
