# Supplementary material
Source: MDPI journal article supplement (https://www.mdpi.com/2073-4395/11/10/2023)
Supplement: s1 [file s1]

**Table S1.** Number of the treated flowers and recovered fruits in the performed treatments (E, SP and CP) in each variety.

|              | E               |                  | SP              |                  | CP              |                  |
|--------------|-----------------|------------------|-----------------|------------------|-----------------|------------------|
|              | Treated flowers | Recovered fruits | Treated flowers | Recovered fruits | Treated flowers | Recovered fruits |
| `Clemenules´ | 250             | 38               | 250             | 39               | 200             | 167              |
| `Monreal´    | 575             | 0                | 220             | 150              | 220             | 163              |
| `Campeona´   | 200             | 17               | 200             | 84               | 200             | 112              |
| `Imperial´   | 210             | 40               | 200             | 65               | 200             | 133              |
| `Salteñita´  | 220             | 10               | 220             | 127              | 220             | 155              |
| `Fortune´    | 310             | 0                | 255             | 23               | 237             | 149              |
| `Moncada´    | 225             | 77               | 220             | 73               | 220             | 159              |
| `Ellendale´  | 305             | 16               | 295             | 16               | 275             | 165              |
| `Serafines´  | 195             | 125              | 145             | 96               | 205             | 133              |

E: Emasculation; SP: hand self-pollination; CP: hand cross-pollination.

**Table S2.** 95% confidence interval in the comparison by pairs of fruit setting obtained in the performed treatments (E, SP and CP) in each variety.

|              | E-SP          | E-CP          | SP-CP         |
|--------------|---------------|---------------|---------------|
| `Clemenules´ | (-0,05; 0,06) | (0,61; 0,75)  | (0,61; 0,74)  |
| `Monreal´    | (0,62; 0,74)  | (0,68; 0,80)  | (-0,02; 0,13) |
| `Campeona´   | (0,25; 0,41)  | (0,39; 0,55)  | (0,06; 0,21)  |
| `Imperial´   | (0,05; 0,21)  | (0,39; 0,55)  | (0,25; 0,42)  |
| `Salteñita´  | (0,46; 0,60)  | (0,59; 0,72)  | (0,06; 0,19)  |
| `Fortune´    | (0,05; 0,12)  | (0,56; 0,69)  | (0,47; 0,60)  |
| `Moncada´    | (-0,10; 0,07) | (0,29; 0,46)  | (0,30; 0,47)  |
| `Ellendale´  | (-0,03; 0,03) | (0,48; 0,61)  | (0,48; 0,60)  |
| `Serafines´  | (-0,08; 0,12) | (-0,08; 0,10) | (-0,10; 0,08) |

E: Emasculación; SP: hand self-pollination; CP: hand cross-pollination. If the confidence interval excludes zero, there are differences in the fruit setting percentages between the compared treatments.

**Table S3.** SSR markers used for the genetic analysis of the recovered plants from the self-pollinated flowers of 'Imperial' mandarin and 'Ellendale' tangor.

| <i>Locus</i> | Noted alleles in Imperial | Noted alleles in Ellendale | LG | Pos | AT | Bibliographic reference |
|--------------|---------------------------|----------------------------|----|-----|----|-------------------------|
| JK-TAA15     | 188-191                   | 164-204                    | 1  | 120 | 55 | [1]                     |
| Ci02G12      | 240-250                   | 248-250                    |    |     | 55 | [2]                     |
| JK-TAA41     | 148-154                   | 135-158                    | 2  | 161 | 55 | [1]                     |
| MEST86       | 113-120                   |                            | 8  | 15  | 55 | [3]                     |
| MEST192      | 222-230                   |                            | 6  | 65  | 55 | [4]                     |
| Ci04H06      | 188-190                   |                            | 2  | 28  | 55 | [5]                     |
| mCrCIR03G05  | 222-228                   |                            | 4  | 75  | 50 | [5]                     |
| mCrCi05A05   | 144-152                   |                            | 2  | 153 | 50 | [5]                     |
| mCrCIR02D09  | 236-240                   |                            | 2  | 13  | 55 | [5]                     |
| Ci02D04b     |                           | 201-229                    | 4  | 86  | 50 | [6]                     |
| mCrCIR07F11  |                           | 160-162                    | 9  | 49  | 50 | [6]                     |
| MEST15       |                           | 174-189                    |    |     | 55 | [3]                     |
| MEST104      |                           | 236-242                    | 5  | 35  | 55 | [3]                     |
| mCrCIR01C06  |                           | 127-129                    | 6  | 89  | 50 | [5]                     |

Numbers indicate the size of alleles in nucleotides for SSR markers. (LG) Linkage group; (Pos) Marker position in the reference Clementine genetic map (Ollitrault et al. 2012), centimorgans (cM); (AT) Annealing Temperature °C.

1. Kijas, J.M.H.; Thomas, M.R.; Fowler, J.C.S.; Roose, M.L. Integration of trinucleotide microsatellites into a linkage map of Citrus. *Theor. Appl. Genet.* **1997**, *94*, 701–706, doi:10.1007/s001220050468.
2. Froelicher, Y.; Dambier, D.; Bassene, J.B.; Constantino, G.; Lotfy, S.; Didout, C.; Beaumont, V.; Brottier, P.; Risterucci, A.M.; Luro, F.; et al. Characterization of microsatellite markers in mandarin orange (*Citrus reticulata* Blanco). *Mol. Ecol. Resour.* **2008**, *8*, 119–122, doi:https://doi.org/10.1111/j.1471-8286.2007.01893.x.
3. García-Lor, A.; Luro, F.; Navarro, L.; Ollitrault, P. Comparative use of InDel and SSR markers in deciphering the interspecific structure of cultivated citrus genetic diversity: a perspective for genetic association studies. *Mol. Genet. Genomics* **2012**, *287*, 77–94, doi:10.1007/s00438-011-0658-4.
4. Aleza, P.; Froelicher, Y.; Schwarz, S.; Agustí, M.; Hernández, M.; Juárez, J.; Luro, F.; Morillon, R.; Navarro, L.; Ollitrault, P. Tetraploidization events by chromosome doubling of nucellar cells are frequent in apomictic citrus and are dependent on genotype and environment. *Ann. Bot.* **2011**, *108*, 37–50, doi:10.1093/aob/mcr099.
5. Cuenca, J.; Froelicher, Y.; Aleza, P.; Juárez, J.; Navarro, L.; Ollitrault, P. Multilocus half-tetrad analysis and centromere mapping in citrus: evidence of SDR mechanism for 2n megagametophyte production and partial chiasma interference in mandarin cv "Fortune." *Heredity (Edinb.)* **2011**, *107*, 462–470, doi:10.1038/hdy.2011.33.
6. Kamiri, M.; Stift, M.; Srairi, I.; Costantino, G.; Moussadik, A. El; Hmyene, A.; Bakry, F.; Ollitrault, P.; Froelicher, Y. Evidence for non-disomic inheritance in a Citrus interspecific tetraploid somatic hybrid between *C. reticulata* and *C. limon* using SSR markers and cytogenetic analysis. *Plant Cell Rep.* **2011**, *30*, 1415–1425, doi:10.1007/s00299-011-1050-x.

**Table S4.** Observed alleles with the SSR markers used for the genetic analysis of the diploid hybrids recovered from the self-pollination of 'Imperial' mandarin and 'Ellendale' tangor.

|               | JK-TAA41 | Ci02G12 | Ci04H06 | mCrCi05A05 | mCrCIR03G05 | mCrCIR02D09 | MEST86  | MEST192 |
|---------------|----------|---------|---------|------------|-------------|-------------|---------|---------|
| Imperial      | 148-154  | 240-250 | 188-190 | 144-152    | 222-228     | 236-240     | 113-120 | 222-230 |
| Imperial SP-1 | 148-154  | 240-250 | 188-188 | 152-152    | 222-228     | 236-240     | 113-113 | 230-230 |
| Imperial SP-2 | 148-154  | 240-250 | 188-188 | 144-152    | 222-228     | 236-240     | 113-120 | 230-230 |
| Imperial SP-3 | 154-154  | 240-240 | 188-188 | 152-152    | 222-228     | 236-240     | 113-113 | 222-230 |
| Imperial SP-4 | 148-154  | 240-250 | 188-188 | 144-152    | 222-228     | 236-236     | 113-120 | 222-230 |
| Imperial SP-5 | 154-154  | 250-250 | 188-188 | 152-152    | 222-228     | 236-240     | 113-113 | 222-222 |
| Imperial SP-6 | 148-154  | 240-250 | 188-188 | 144-152    | 222-222     | 236-240     | 113-120 | 230-230 |

|                 | JK-TAA15 | JK-TAA41 | Ci02G12 | Ci02D04b | mCrCIR01C06 | mCrCIR07F11 | MEST15  | MEST104 |
|-----------------|----------|----------|---------|----------|-------------|-------------|---------|---------|
| Ellendale       | 164-204  | 138-158  | 248-250 | 201-229  | 131-133     | 160-162     | 174-189 | 236-242 |
| Ellendale SP-1  | 204-204  | 138-138  | 248-248 | 201-229  | 131-133     | 162-162     | 189-189 | 236-242 |
| Ellendale SP-2  | 164-204  | 138-158  | 248-250 | 201-229  | 133-133     | 160-162     | 174-189 | 236-242 |
| Ellendale SP-3  | 164-164  | 138-158  | 248-248 | 201-229  | 133-133     | 162-162     | 189-189 | 242-242 |
| Ellendale SP-4  | 164-164  | 138-158  | 250-250 | 229-229  | 133-133     | 160-162     | 174-189 | 236-242 |
| Ellendale SP-5  | 164-164  | 158-158  | 250-250 | 201-229  | 133-133     | 160-162     | 174-189 | 242-242 |
| Ellendale SP-6  | 164-204  | 158-158  | 248-248 | 201-229  | 131-133     | 160-162     | 189-189 | 242-242 |
| Ellendale SP-7  | 204-204  | 138-158  | 248-248 | 201-201  | 133-133     | 160-162     | 174-189 | 236-242 |
| Ellendale SP-8  | 164-164  | 138-138  | 248-250 | 201-229  | 131-133     | 160-160     | 174-189 | 242-242 |
| Ellendale SP-9  | 164-204  | 138-158  | 248-250 | 201-229  | 131-133     | 160-162     | 174-189 | 236-236 |
| Ellendale SP-10 | 164-164  | 138-158  | 248-250 | 201-229  | 131-131     | 160-162     | 174-189 | 236-242 |
| Ellendale SP-11 | 164-164  | 138-158  | 248-250 | 201-229  | 131-131     | 160-162     | 174-189 | 236-242 |

Numbers indicate the size of alleles in nucleotides for SSR markers.

**Table S5.** Number of seeds per fruit (nsp) from SP treatment and fruit setting percentage (fsp) from E, SP and CP treatments obtained in preliminary study.

|              | SP (nsp) | E (fsp) | SP (fsp) | CP (fsp) |
|--------------|----------|---------|----------|----------|
| `Clemenules´ | 0        | 19 (a)  | 20 (a)   | 85 (b)   |
| `Monreal´    | 14.5     | 0       | 75 (a)   | 80 (a)   |
| `Campeona´   | 5.4      | 6 (a)   | 21 (b)   | 36 (c)   |
| `Imperial´   | 0        | 2 (a)   | 6 (a)    | 36 (b)   |
| `Salteñita´  | 10.6     | 3 (a)   | 62 (b)   | 67 (b)   |
| `Fortune´    | 0        | 0       | 13 (a)   | 74 (b)   |
| `Moncada´    | 0        | 38 (a)  | 31 (a)   | 88 (b)   |
| `Ellendale´  | 1.1 *    | 4 (a)   | 11 (b)   | 63 (c)   |
| `Serafines´  | Np       | 60 (a)  | Np       | 60 (a)   |

SP: hand self-pollination; E: Emasculation; CP: hand cross-pollination. For each variety, significant differences in fsp (95% confidence interval for fruit setting proportions) between treatments are indicated by different letters in brackets. Np: Not performed. \*Ellendale produced 57% of seedless fruits and 43% of fruits with an average of 2.6 seeds per fruit.

**Table S6.** Number of treated flowers, recovered fruits and fruit set percentage from treatments E and CP in each of the four replicates R1, R2, R3 and R4, and for each studied variety.

|              |    | E               |                  |               | CP              |                  |               |
|--------------|----|-----------------|------------------|---------------|-----------------|------------------|---------------|
|              |    | Treated flowers | Recovered fruits | Fruit Set (%) | Treated flowers | Recovered fruits | Fruit Set (%) |
| `Clemenules´ | R1 | 75              | 18               | 24 (a)        | 50              | 43               | 86 (b)        |
|              | R2 | 60              | 4                | 7 (a)         | 50              | 38               | 76 (b)        |
|              | R3 | 45              | 12               | 27 (a)        | 50              | 40               | 80 (b)        |
|              | R4 | 70              | 4                | 6 (a)         | 50              | 46               | 92 (b)        |
| `Monreal´    | R1 | 75              | 0                | 0 (a)         | 60              | 48               | 80 (b)        |
|              | R2 | 390             | 0                | 0 (a)         | 50              | 35               | 70 (b)        |
|              | R3 | 60              | 0                | 0 (a)         | 60              | 49               | 82 (b)        |
|              | R4 | 50              | 0                | 0 (a)         | 50              | 31               | 62 (b)        |
| `Campeona´   | R1 | 50              | 1                | 2 (a)         | 50              | 23               | 46 (b)        |
|              | R2 | 50              | 5                | 10 (a)        | 50              | 25               | 50 (b)        |
|              | R3 | 50              | 10               | 20 (a)        | 50              | 30               | 60 (b)        |
|              | R4 | 50              | 1                | 2 (a)         | 50              | 34               | 68 (b)        |
| `Imperial´   | R1 | 50              | 1                | 2 (a)         | 50              | 18               | 36 (b)        |
|              | R2 | 50              | 19               | 38 (a)        | 50              | 39               | 78 (b)        |
|              | R3 | 60              | 5                | 8 (a)         | 50              | 35               | 70 (b)        |
|              | R4 | 50              | 15               | 30 (a)        | 50              | 41               | 82 (b)        |
| `Salteñita´  | R1 | 70              | 2                | 3 (a)         | 70              | 47               | 67 (b)        |
|              | R2 | 50              | 2                | 4 (a)         | 50              | 38               | 76 (b)        |
|              | R3 | 50              | 1                | 2 (a)         | 50              | 29               | 58 (b)        |
|              | R4 | 50              | 5                | 10 (a)        | 50              | 41               | 82 (b)        |
| `Fortune´    | R1 | 60              | 0                | 0 (a)         | 25              | 18               | 72 (b)        |
|              | R2 | 100             | 0                | 0 (a)         | 62              | 45               | 73 (b)        |
|              | R3 | 50              | 0                | 0 (a)         | 50              | 28               | 56 (b)        |
|              | R4 | 100             | 0                | 0 (a)         | 100             | 58               | 58 (b)        |
| `Moncada´    | R1 | 75              | 30               | 40 (a)        | 75              | 52               | 69 (b)        |
|              | R2 | 20              | 9                | 45 (a)        | 20              | 20               | 100 (b)       |
|              | R3 | 80              | 28               | 35 (a)        | 75              | 57               | 76 (b)        |
|              | R4 | 50              | 10               | 20 (a)        | 50              | 30               | 60 (b)        |
| `Ellendale´  | R1 | 70              | 0                | 0 (a)         | 60              | 32               | 53 (b)        |
|              | R2 | 35              | 5                | 14 (a)        | 25              | 18               | 72 (b)        |
|              | R3 | 100             | 4                | 4 (a)         | 100             | 61               | 61 (b)        |
|              | R4 | 100             | 7                | 7 (a)         | 90              | 54               | 60 (b)        |
| `Serafines´  | R1 | 45              | 27               | 60 (a)        | 45              | 27               | 60 (a)        |
|              | R2 | 40              | 25               | 63 (a)        | 50              | 29               | 58 (a)        |
|              | R3 | 50              | 30               | 60 (a)        | 50              | 35               | 70 (a)        |
|              | R4 | 60              | 43               | 72 (a)        | 60              | 42               | 70 (a)        |

E: Emasculación; CP: hand cross-pollination. Four trees of each variety were used to perform the treatments. Thus, four replicates R1, R2, R3 and R4 per treatment were performed in each variety. For each replicate, significant differences in fruit set percentage (95% confidence interval for fruit setting proportions) between treatments are indicated by different letters in brackets.
