# Supplementary material
Source: MDPI journal article supplement (https://www.mdpi.com/2073-4395/11/10/2023)
Supplement: s1 [file s1 › SM-Figure.pdf]

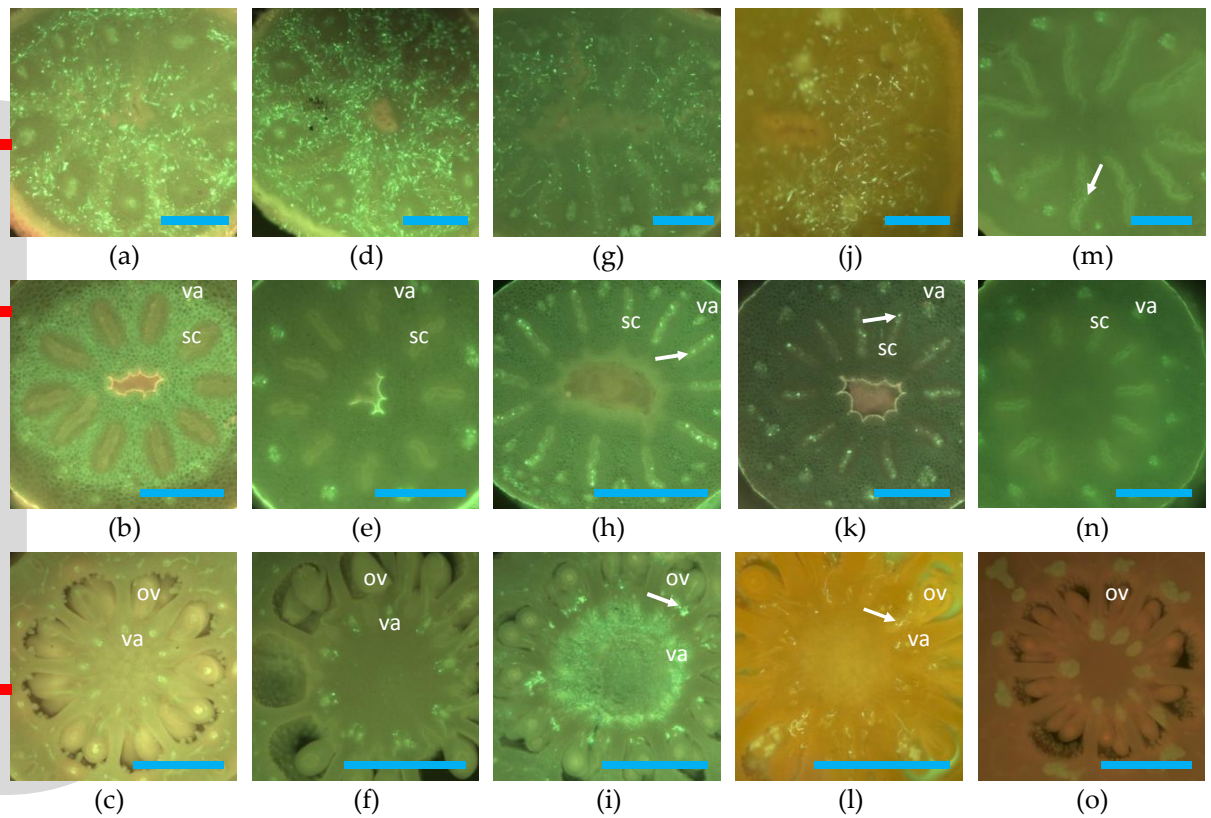

**Figure S1.** Histological sections of pistils after 10 days of self-pollination. Self-incompatible varieties: (a-c) 'Clemenules' clementine and (d-f) 'Moncada' mandarin; Self-compatible varieties: (g-i) 'Campeona' mandarin and (j-l) 'Salteñita' mandarin; Male sterile 'Serafines' satsuma (m-o) with no pollen tuber growing through the middle stigma. Left side of the figure represent a pistil with red lines indicating the transversal sections observed that corresponds with middle stigma (a), (d), (g), (j) (d), upper style (b), (e), (h), (k) (d), and ovary (c), (f), (i), (l), (o). Pollen tubes are marked by an arrow; va: vascular axis; sc: stylar canal; ov: ovule. Scale bars are depicted by blue lines: (a), (d), (g), (j) and (m) 0.5 mm; (b), (e), (h), (k) and (n) 0.25 mm; (c), (f), (i), (l) and (o) 1 mm.

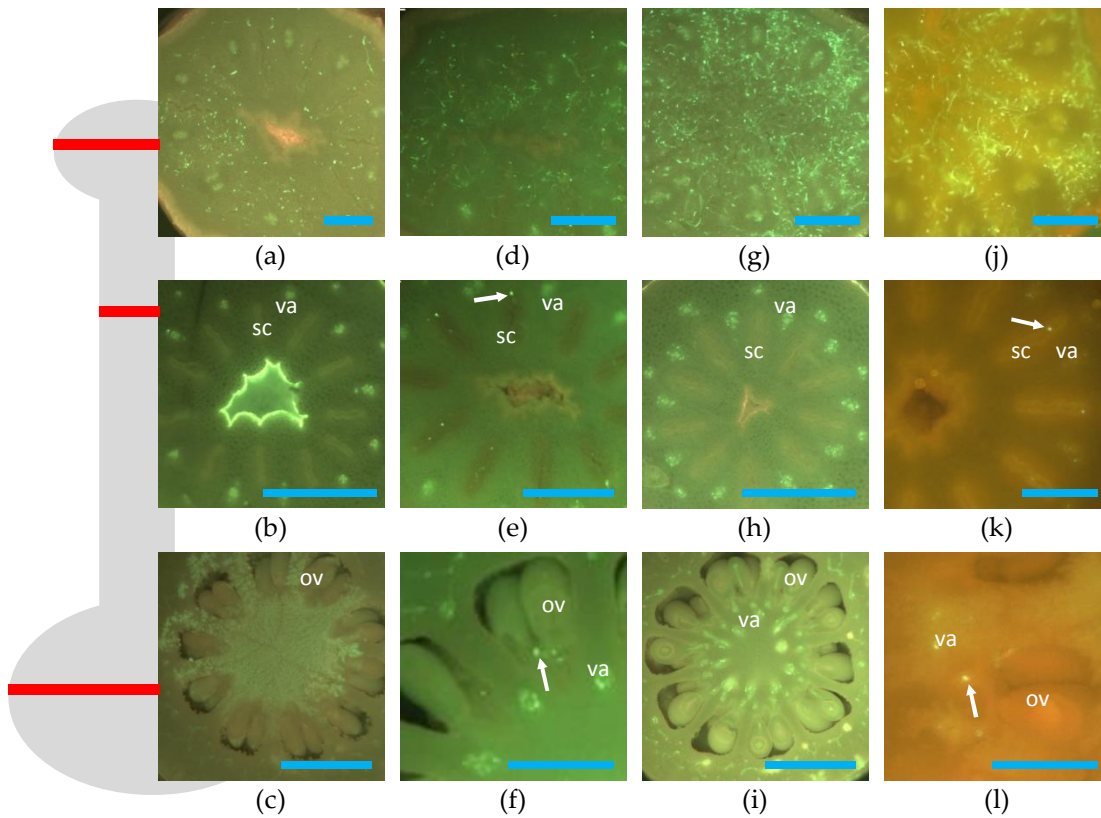

**Figure S2.** Histological sections of pistils after 10 days of self-pollination. (a-f) 'Imperial' mandarin: (a-c) showing self-incompatibility reaction with no pollen tubes growing into the upper style and ovary. (d-f) 'Imperial' mandarin displaying pollen tubes into the style and ovary indicating partial self-incompatibility. (g-l) 'Ellendale' tangor: (g-i) showing self-incompatibility reaction with no pollen tubes growing into the upper style and ovary. (j-l) 'Ellendale' tangor displaying pollen tubes into the style and ovary indicating partial self-incompatibility. Left side of the figure represent a pistil with red lines indicating the transversal sections observed that corresponds with middle stigma (a), (d), (g), (j), upper style (b), (e), (h), (k) and ovary (c), (f), (i), (l). Pollen tubes are marked by an arrow; va: vascular axis; sc: styler canal; ov: ovule. Scale bars are depicted by blue lines: (a), (b), (d), (e), (g), (h), (j) and (k) 0.25 mm; (f) and (l) 0.5 mm; (c) and (i) 1 mm.
